# Supplementary material for: Comparison of the Effect of Two Different Handling Conditions at Slaughter in Saliva Analytes in Pigs
Source: MDPI journal article supplement (doi:10.3390/metabo14040234), 2024-04-18
Supplement: s1 [file s1]

## Supplementary material

**Supplementary Table S1.** Assays used for the measurement of salivary stress biomarkers .

| Analytical method | Reference                                                                                           | Precision                                         | Accuracy                        | Limit of detection |
|-------------------|-----------------------------------------------------------------------------------------------------|---------------------------------------------------|---------------------------------|--------------------|
| Cortisol          | Siemens Health Diagnostics, Deerfield, IL.                                                          | Within-run: 2.9-11.6%<br>Between-run: 4.3-15.6%   | $R^2 > 0.995$<br>Recovery 91.9% | 0.016 µg/dL        |
| sAA               | Alpha-Amylase, Beckman Coulter Inc.                                                                 | Within-run: 0.9-2.1%<br>Between-run: 3.6-9.2%     | $R^2 > 0.998$                   | 11.65 IU/L         |
| TEA               | Home-made method using 4-nitrophenyl acetate (Sigma-Aldrich Co, St Louis, Mo, USA) as substrate     | Within-run: 1.78-2.57%<br>Between-run: 1.95-3.72% | $R^2 > 0.995$                   | 2.06 IU/L          |
| BChE              | Home-made method using butyrylthiocholine iodide (Sigma-Aldrich Co, St Louis, Mo, USA) as substrate | Within-run: 2.57-4.59%<br>Between-run: 3.94-4.94% | $R^2 > 0.998$                   | 11.26 IU/mL        |
| Oxytocin          | Home-made method using AlphaLISA (PerkinElmer, MA, USA) technology                                  | Within-run: 5.02-6.07%<br>Between-run: 4.6-17.7%  | $R^2 > 0.959$<br>Recovery 104%  | 112.95 pg/mL       |

sAA: salivary Alpha-amylase; TEA: Total esterase activity; BChE: butyrylcholinesterase;  $R^2$ : linearity under dilution coefficient of determination

**Supplementary Table S2.** Assays used for the measurement of salivary immunity and muscle biomarkers.

| Analytical method | Reference                                                           | Precision                                         | Accuracy                             | Limit of detection          |
|-------------------|---------------------------------------------------------------------|---------------------------------------------------|--------------------------------------|-----------------------------|
| ADA               | Adenosine Deaminase assay kit, Diazyme Laboratories, Poway, CA, USA | Within-run: 6.2-8.3%<br>Between-run: 3.9-4.3%     | $R^2 > 0.999$<br>Recovery 93-108%    | 0.07 IU/L                   |
| Hp                | Home-made method using AlphaLISA (PerkinElmer, MA, USA) technology  | <15%                                              | -                                    | -                           |
| Calprotectin      | BÜHLMANN fCal Turbo® assay (BÜHLMANN, Laboratories AG, Switzerland) | Within-run: 2.14-4.86%<br>Between-run: 4.26-6.23% | $R^2 > 0.946$<br>Recovery 110-116.7% | 0.01 mg/L                   |
| CK                | Beckman Coulter Inc., Fullerton, CA, USA                            | <15%                                              | $R^2 > 0.99$<br>(internal data)      | 0.7 IU/L<br>(internal data) |

ADA: adenosine deaminase; Hp: haptoglobin; CK: creatine kinase;  $R^2$ : linearity under dilution coefficient of determination
